# Supplementary material
Source: PubMed Central journal article supplement (PMC5882520)

# Supplementary Material

to

Comprehensive analysis of phospholipids in the brain, heart, kidney, and liver:  
brain phospholipids are least enriched with polyunsaturated fatty acids

Jaewoo Choi<sup>1</sup>, Tai Yin<sup>3</sup>, Koichiro Shinozaki<sup>3</sup>, Joshua W. Lampe<sup>3,4</sup>, Jan F. Stevens<sup>1,2</sup>, Lance B. Becker<sup>3,5</sup>, and Junhwan Kim<sup>3,4\*</sup>

<sup>1</sup>Linus Pauling Institute and <sup>2</sup>Department of Pharmaceutical Sciences, Oregon State University, Corvallis, OR, USA

<sup>3</sup>Department of Emergency Medicine, Feinstein Institute for Medical Research, Manhasset, NY, USA

<sup>4</sup>Department of Molecular Medicine and <sup>5</sup>Department of Emergency Medicine, Hofstra Northwell School of Medicine, Hempstead, NY, USA

\* Correspondence to

Junhwan Kim, Ph.D.

Assistant Professor

The Feinstein Institute for Medical Research

Department of Emergency Medicine

Northwell Health System

350 Community Dr.

Manhasset, NY 11030

Phone: 1-516-562-0452

Email: [jkim46@nshs.edu](mailto:jkim46@nshs.edu)

Supplementary Fig. 1. Ion chromatograms of individual classes of phospholipids extracted from whole heart tissue. Ion chromatograms are generated using the most abundant species of each class.

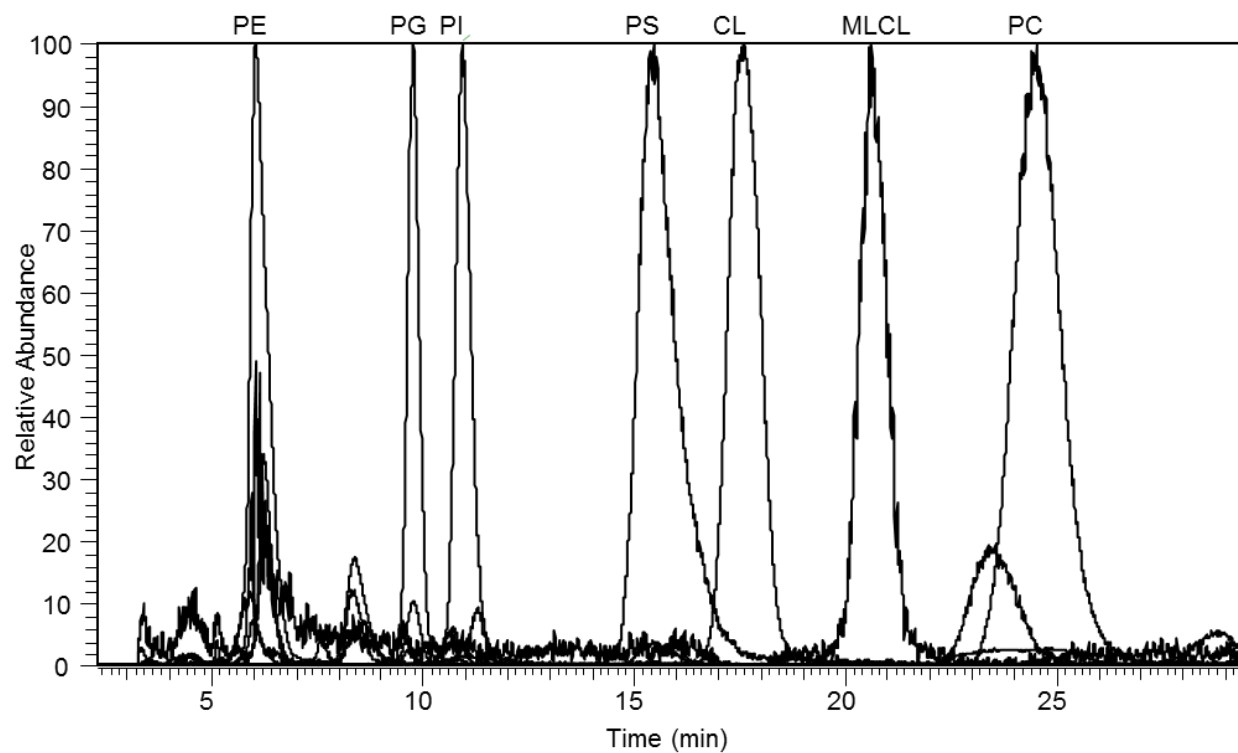

Supplementary Fig. 2. Mass spectra of PI in the brain (top left), heart (top right), kidney (bottom left), and liver (bottom right).

RBT1 #3774-4218 RT: 10.14-11.34 AV: 445 NL: 7.97E4  
T: ITMS - c ESI Full ms[350.00-1700.00]

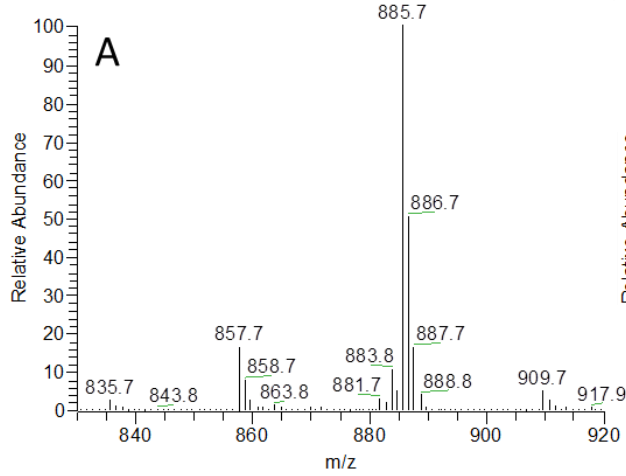

RHT2 #3826-4269 RT: 10.29-11.48 AV: 444 NL: 3.80E4  
T: ITMS - c ESI Full ms[350.00-1700.00]

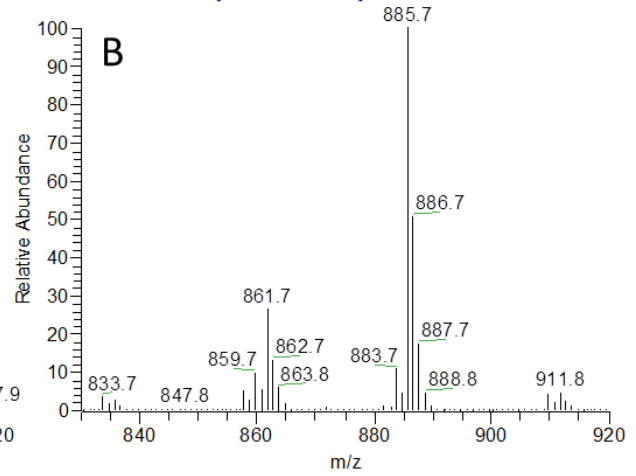

RKT2 #3715-4325 RT: 9.99-11.64 AV: 611 NL: 5.50E4  
T: ITMS - c ESI Full ms[350.00-1700.00]

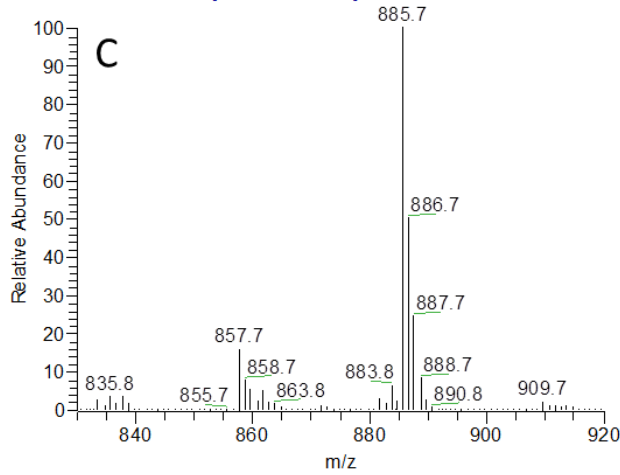

RLT1 #3733-4287 RT: 10.04-11.53 AV: 555 NL: 9.45E4  
T: ITMS - c ESI Full ms[350.00-1700.00]

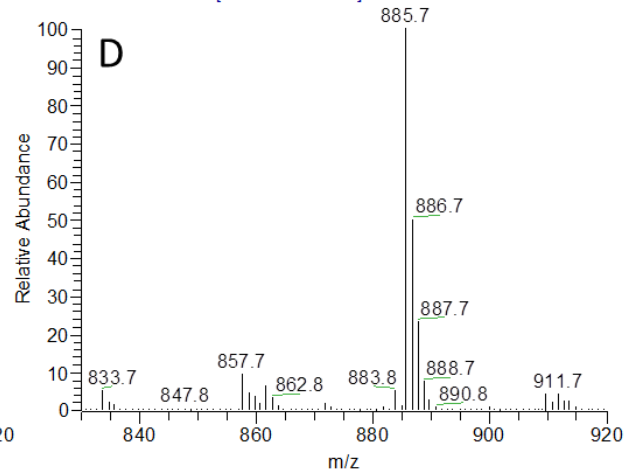

Supplementary Fig. 3. Mass spectra of PG in the brain (top left), heart (top right), kidney (bottom left), and liver (bottom right).

RBT1 #3283-3595 RT: 8.82-9.66 AV: 313 NL: 5.07E3  
T: ITMS - c ESI Full ms[350.00-1700.00]

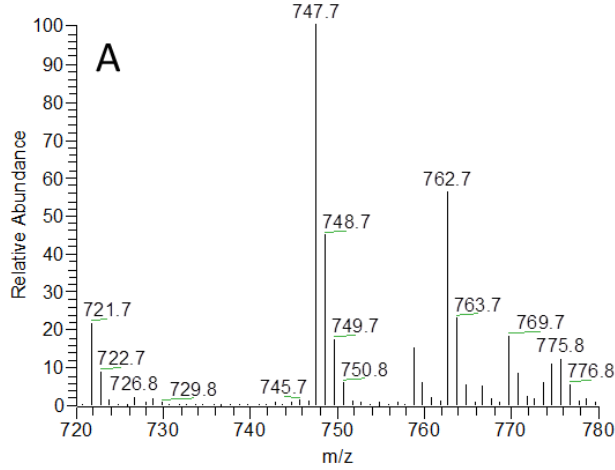

RHT2 #3279-3602 RT: 8.82-9.69 AV: 324 NL: 1.23E4  
T: ITMS - c ESI Full ms[350.00-1700.00]

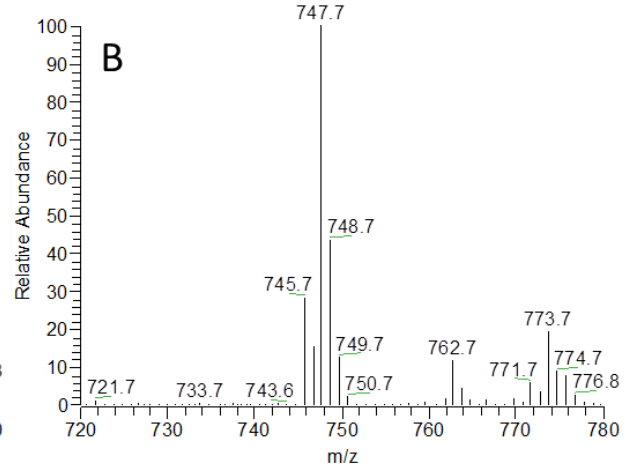

RKT2 #3216-3662 RT: 8.65-9.85 AV: 447 NL: 3.03E3  
T: ITMS - c ESI Full ms[350.00-1700.00]

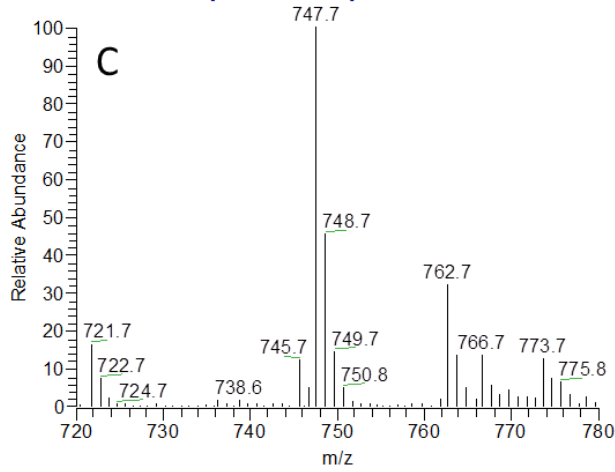

RLT1 #3176-3622 RT: 8.54-9.74 AV: 447 NL: 2.07E3  
T: ITMS - c ESI Full ms[350.00-1700.00]

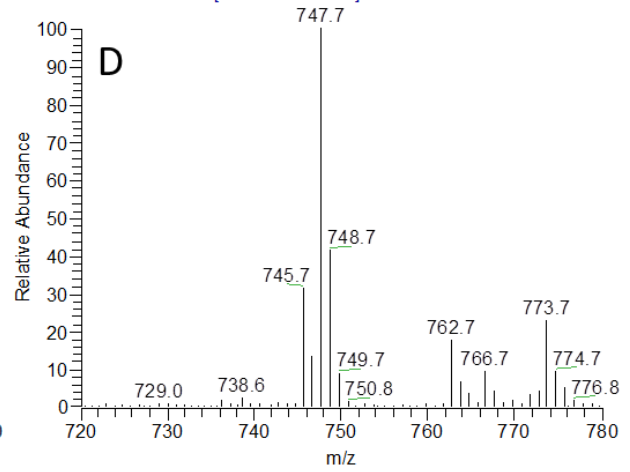

Supplementary Fig. 4. MS/MS spectra of the MS peak at m/z 1448 from the heart (A) and brain (B).

The MS/MS spectra from heart tissue shows typical fragmentation pattern of CL(18:2)<sub>4</sub>; the peak at 695 corresponds to a diacylglycerol moiety containing two 18:2 (A). In brain tissue, additional sets of peaks corresponding to diacylglycerol moiety, 671 and 719, 673 and 717, and 693 and 697, show the existence of at least 4 major isomers with molecular weight of 1448 (B)

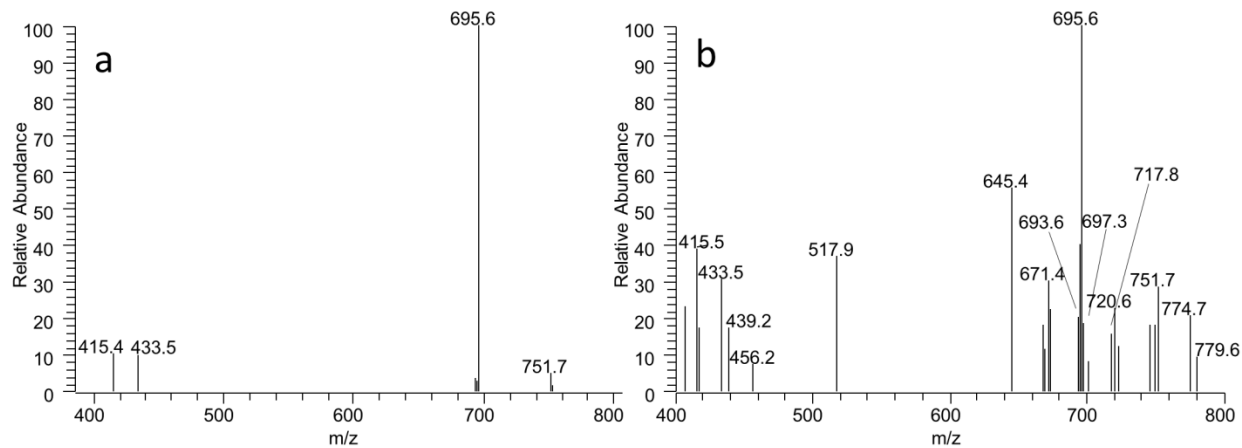

Supplementary Fig. 5. The relative content of lysophospholipids compared to phospholipids in the brain (A), heart (B), kidney (C), and liver (D). LPC(16:0) and LPC(18:0) are significantly higher in kidney and liver tissues (data are presented as mean  $\pm$  standard deviation, n=6).

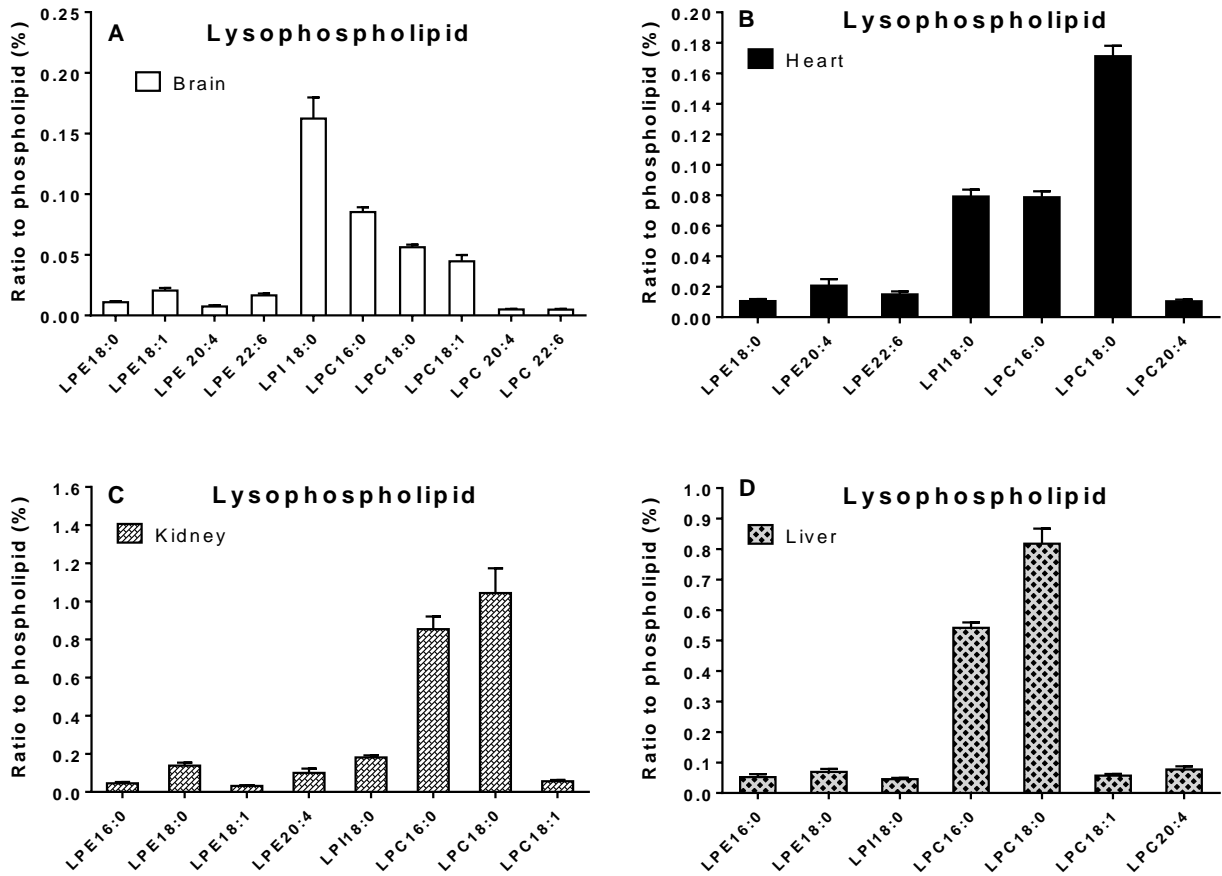

Supplementary Fig. 6. The contents of free fatty acids in the brain, heart, kidney, and liver. Data are presented as mean  $\pm$  standard deviation, n=4, \* against brain, p<0.05).

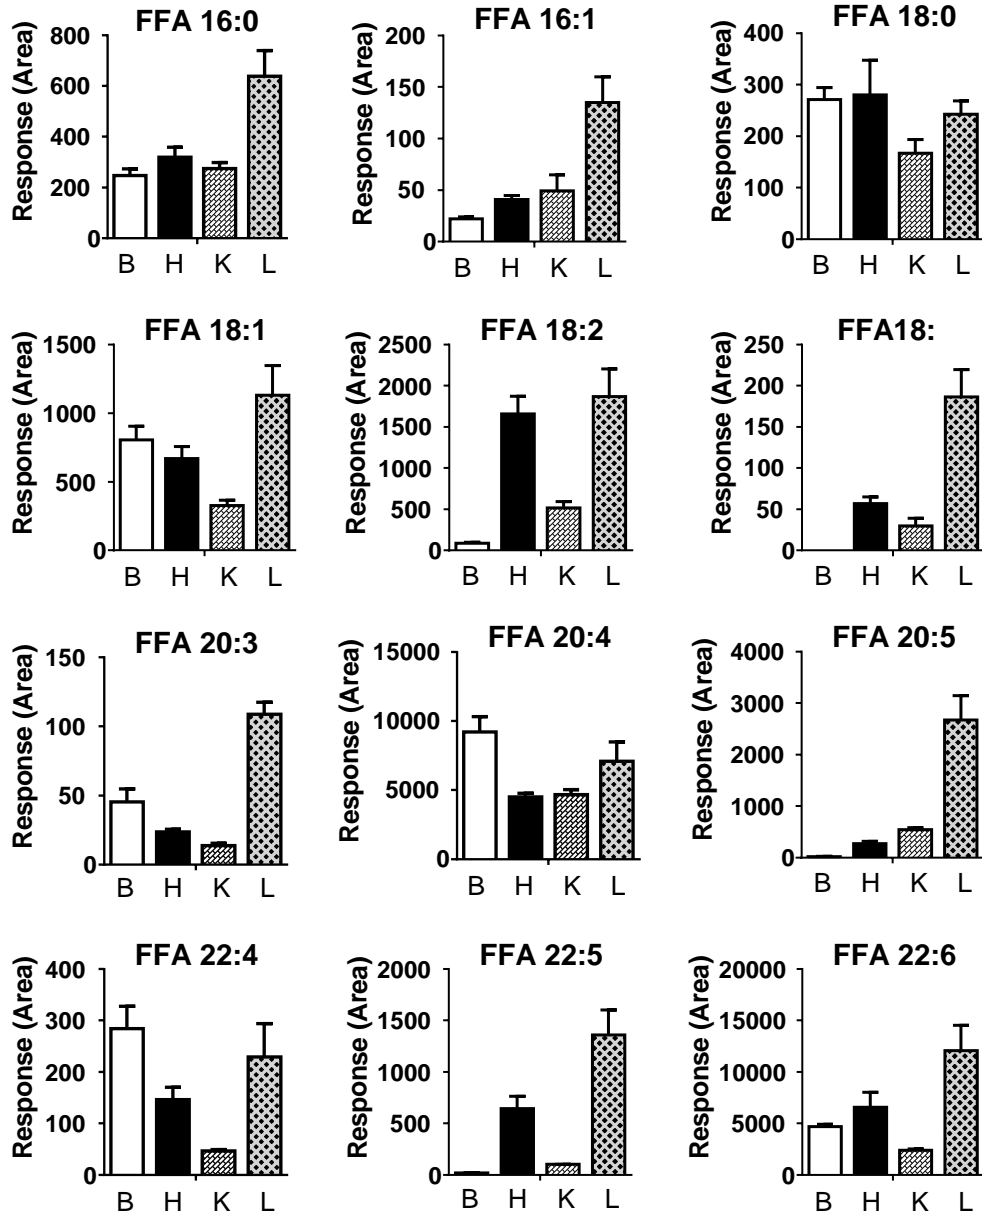

Supplement: NIHMS911876-supplement-11010_2017_3203_MOESM1_ESM.pdf [file NIHMS911876-supplement-11010_2017_3203_MOESM1_ESM.pdf]
